# Supplementary material for: A dual-stimuli-responsive fluorescent switch ultrathin film
Source: Royal Society of Chemistry journal article supplement (doi:10.1039/c5nr05376e), 2015-01-01
Supplement: c5nr05376e1.pdf [file c5nr05376e1.pdf]

**Electronic Supplementary Information for**  
**A Dual-Stimuli-Responsive Fluorescent Switch Ultrathin Film**

**Zhixiong Li, Ruizheng Liang, Wendi Liu, Dongpeng Yan\* and Min Wei\***

*State Key Laboratory of Chemical Resource Engineering, Beijing University of  
Chemical Technology, Beijing 100029, P. R. China*

E-mail: yandongpeng001@163.com (D. Yan); E-mail: weimin@mail.buct.edu.cn (M.  
Wei).

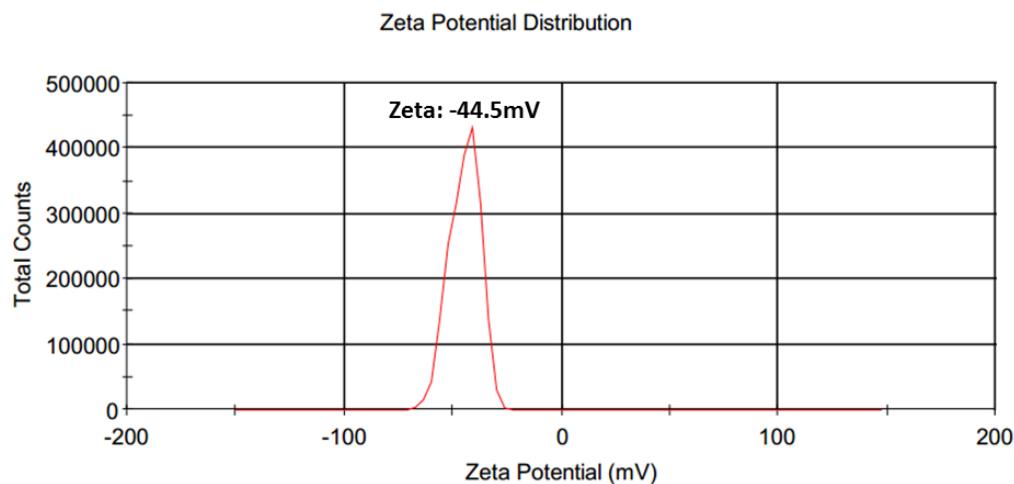

**Figure S1.** The Zeta potential (mV) of SP@PTBEM micelle.

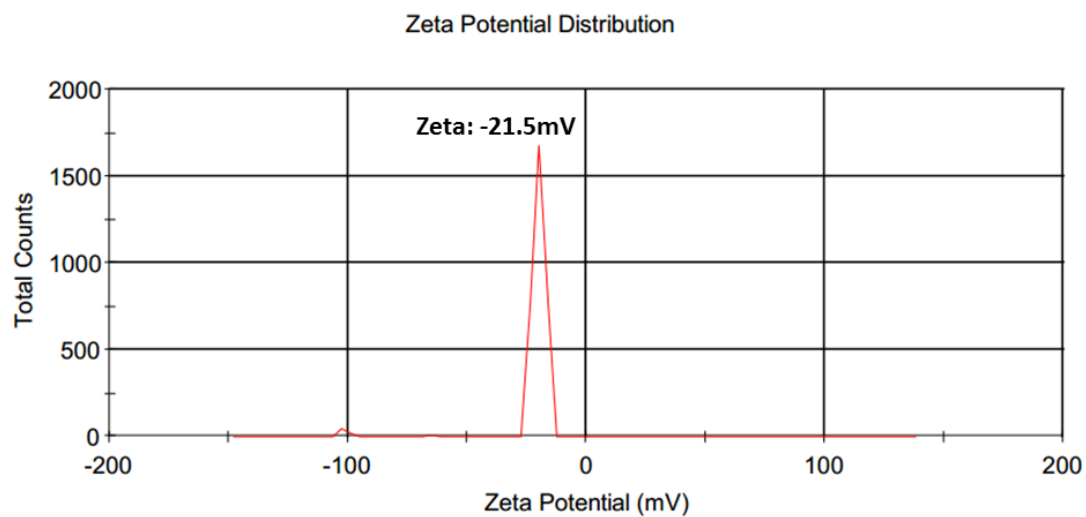

**Figure S2.** The Zeta Potential (mV) of Rf solution.

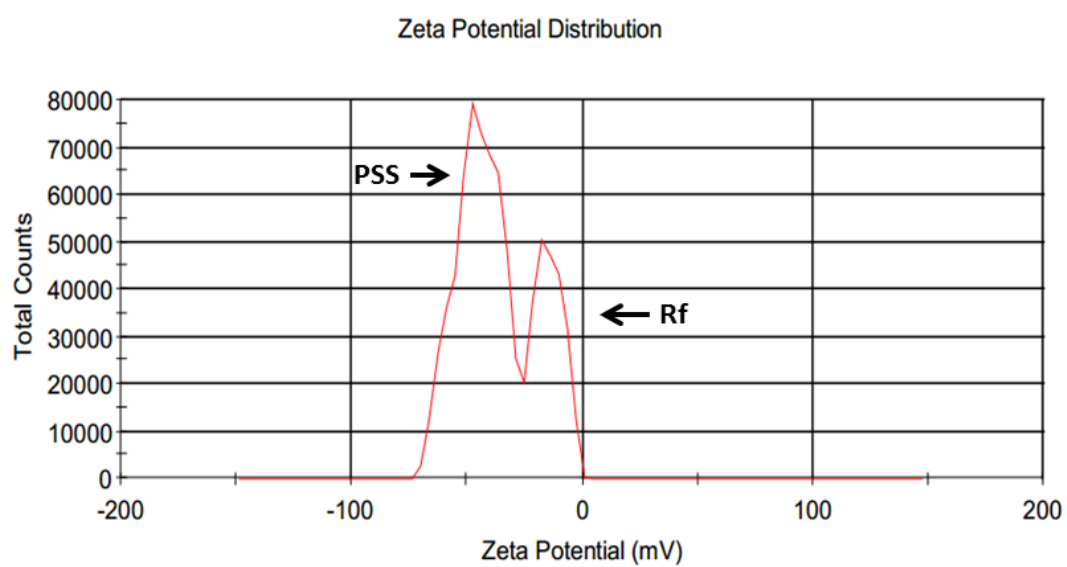

**Figure S3.** The Zeta Potential (mV) of Rf-PSS hybrid solution.

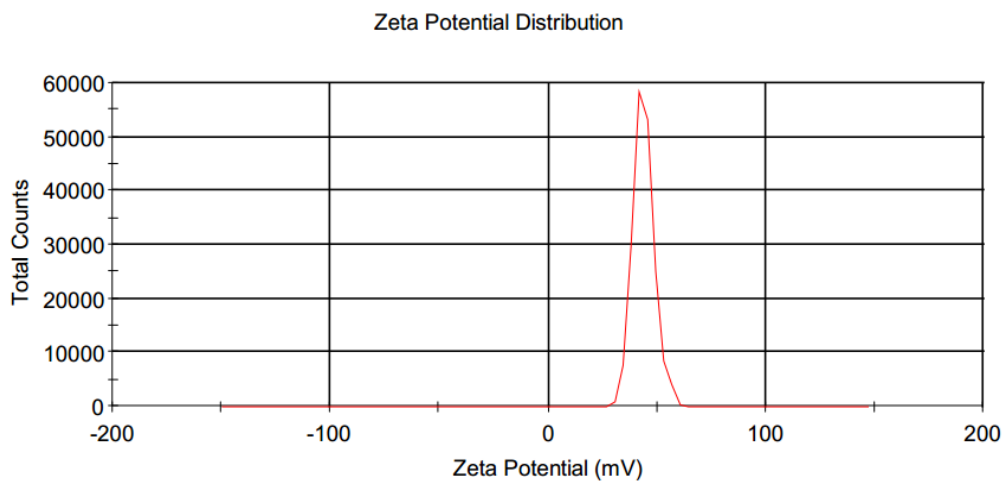

**Figure S4.** The Zeta potential (mV) of LDHs nanosheets suspension.

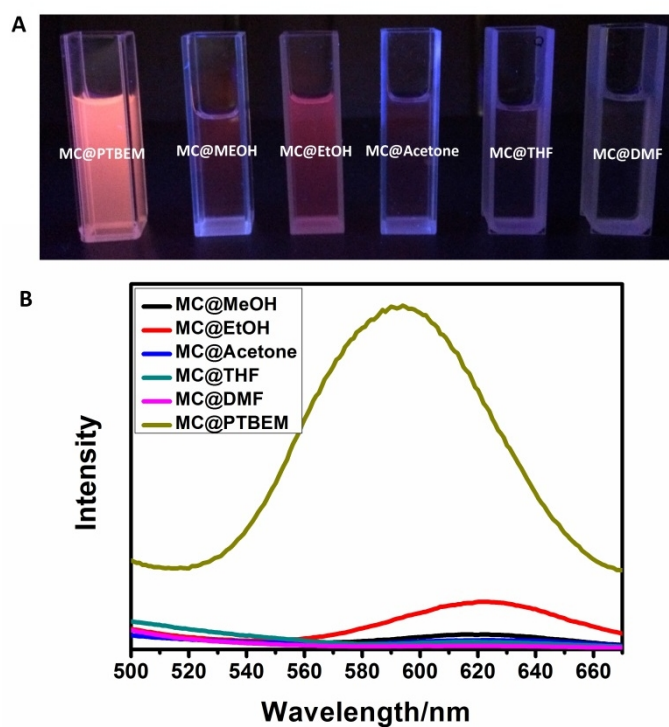

**Figure S5.** (A) The fluorescence photographs and (B) corresponding photoluminescence spectra of MC in various solvents ( $5 \times 10^{-4}$  mol/L) upon irradiation by UV light for 120s.

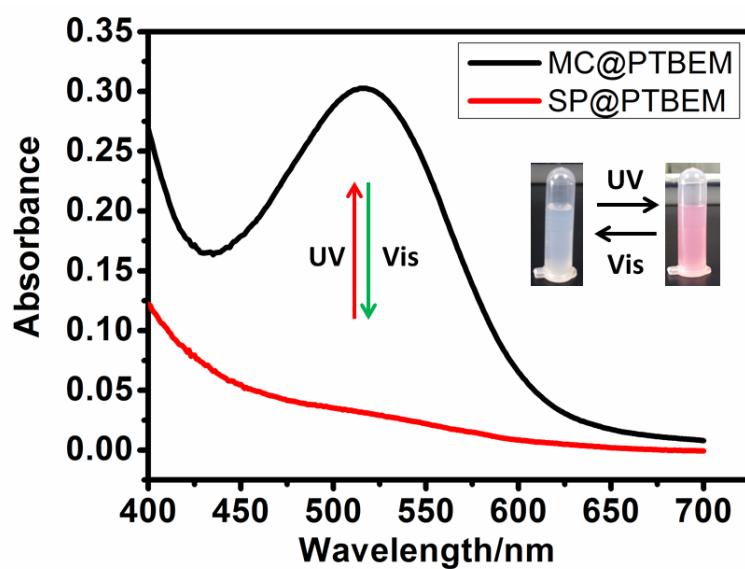

**Figure S6.** UV-Vis absorption spectra of SP@PTBEM and MC@PTBEM, and the insert shows the photograph of change from SP to MC.

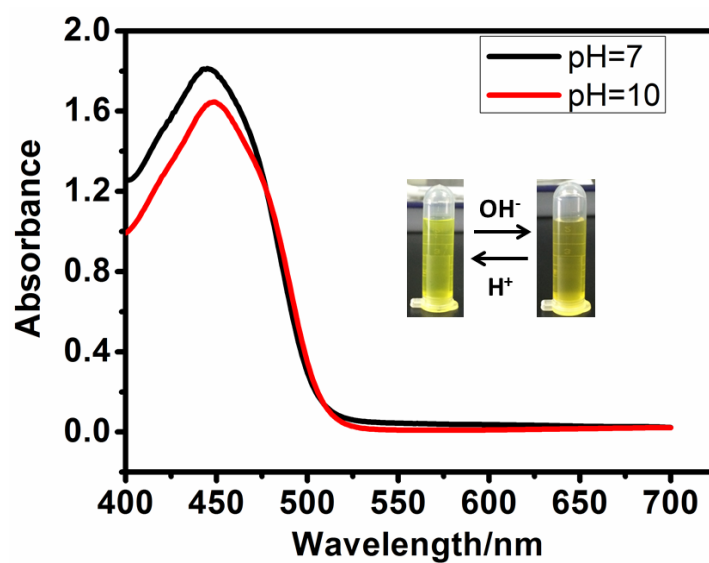

**Figure S7.** UV-Vis absorption spectra of Rf-PSS (pH=7) and Rf-PSS (pH=10), the insert shows the relevant photograph of change between pH=7 and pH=10.

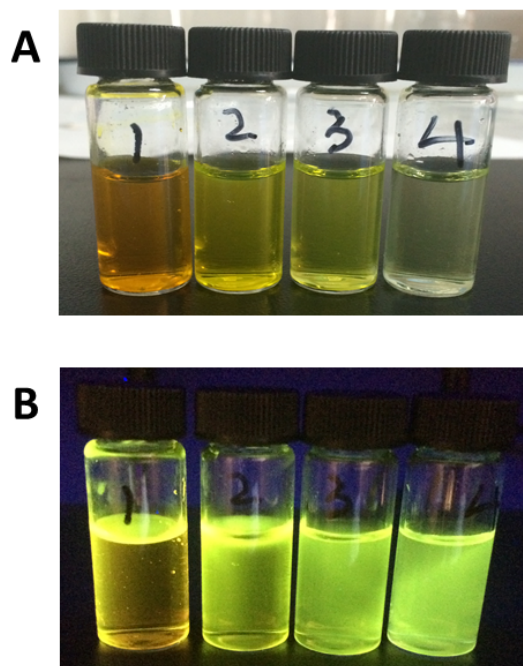

**Figure S8.** The photographs of Rf with different concentration (2 mg/ml, 0.2 mg/ml, 0.02mg/ml, 0.002mg/ml) under (A) the visible light and (B) the UV light.

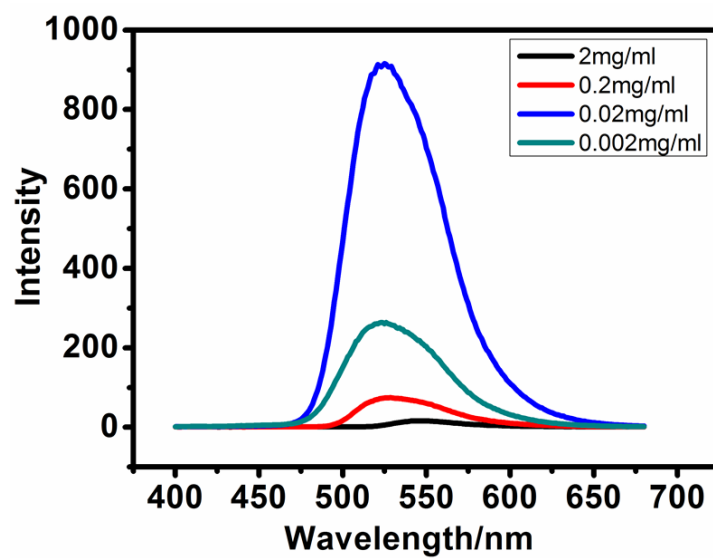

**Figure S9.** The photoluminescence spectra of Rf with different concentrations (2 mg/ml, 0.2 mg/ml, 0.02 mg/ml, 0.002 mg/ml).

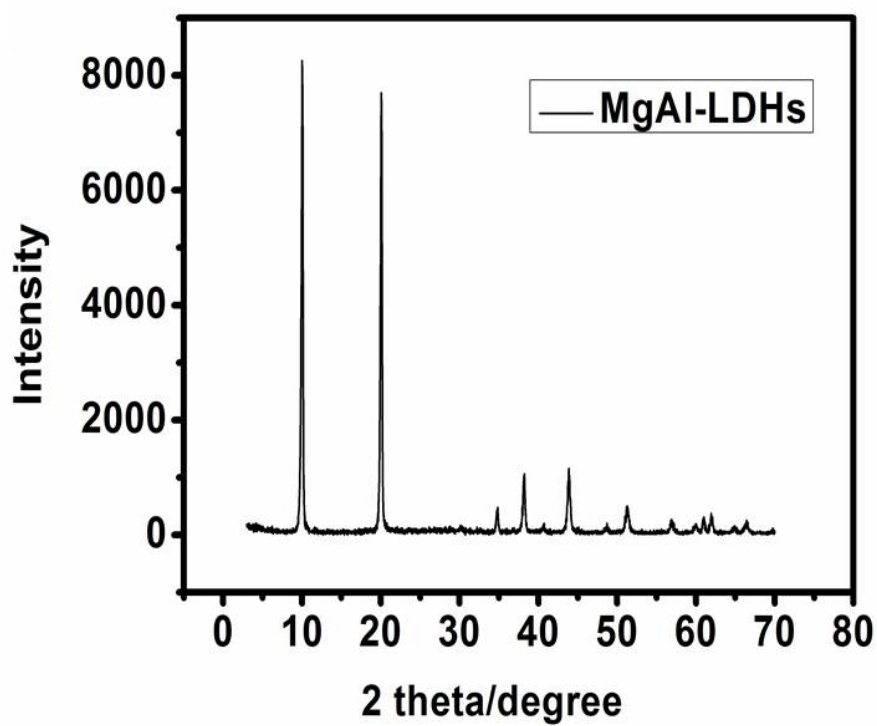

**Figure S10.** The XRD pattern of MgAl-LDHs nanoplatelets.

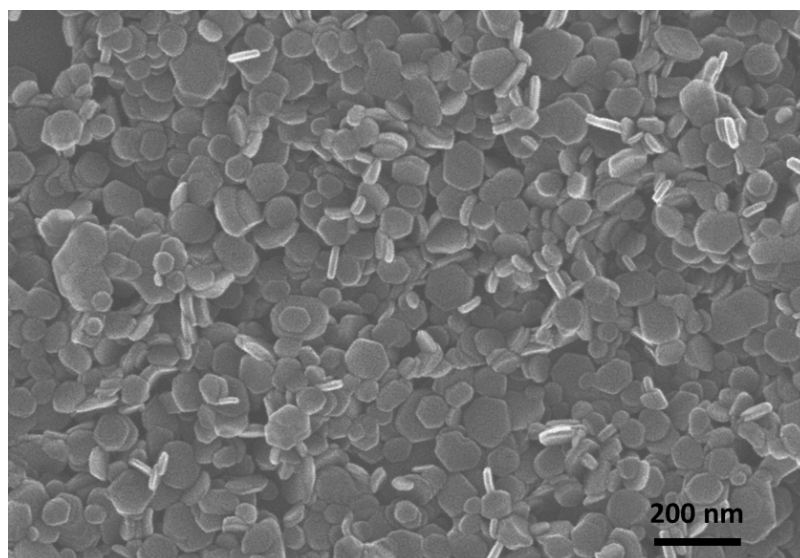

**Figure S11.** The SEM image of MgAl-LDHs nanoplatelets.

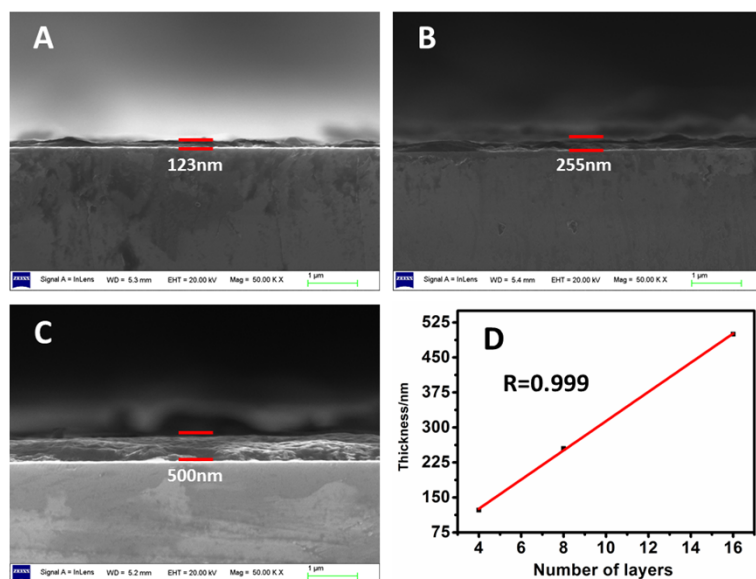

**Figure S12.** Side-view of SEM images for: (A) (SP@PTBEM/LDHs)<sub>4</sub> UTF, (B) (SP@PTBEM/LDHs)<sub>8</sub> UTF, (C) (SP@PTBEM/LDHs)<sub>16</sub> UTF on a silicon substrate. (D) The linear correlation between thickness of (SP@PTBEM/LDHs)<sub>n</sub> UTFs and bilayer number  $n$ , with a bilayer thickness of 31 nm.

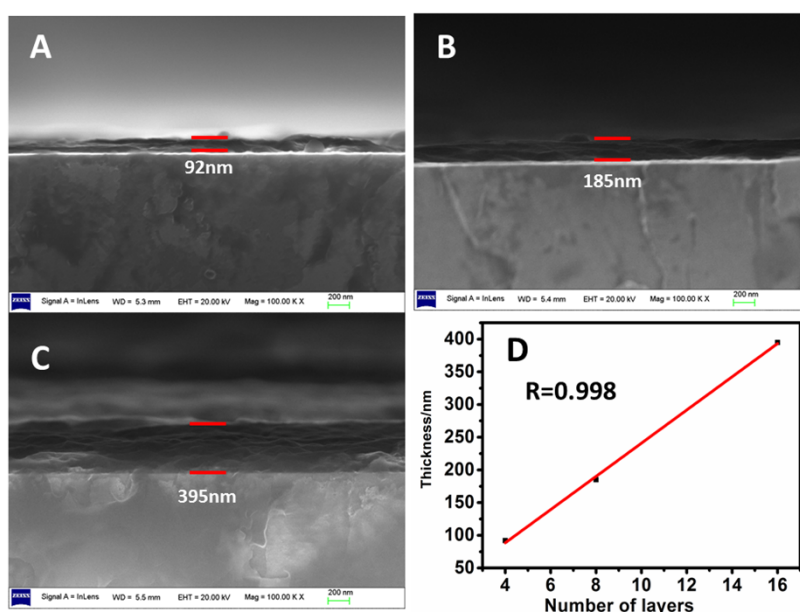

**Figure S13.** Side-view of SEM images for: (A) (Rf-PSS/LDHs)<sub>4</sub> UTF, (B) (Rf-PSS/LDHs)<sub>8</sub> UTF, (C) (Rf-PSS/LDHs)<sub>16</sub> UTF on a silicon substrate. (D) The linear correlation between thickness of (Rf-PSS/LDHs)<sub>n</sub> UTFs and bilayer number  $n$ , with a bilayer thickness of 25 nm.

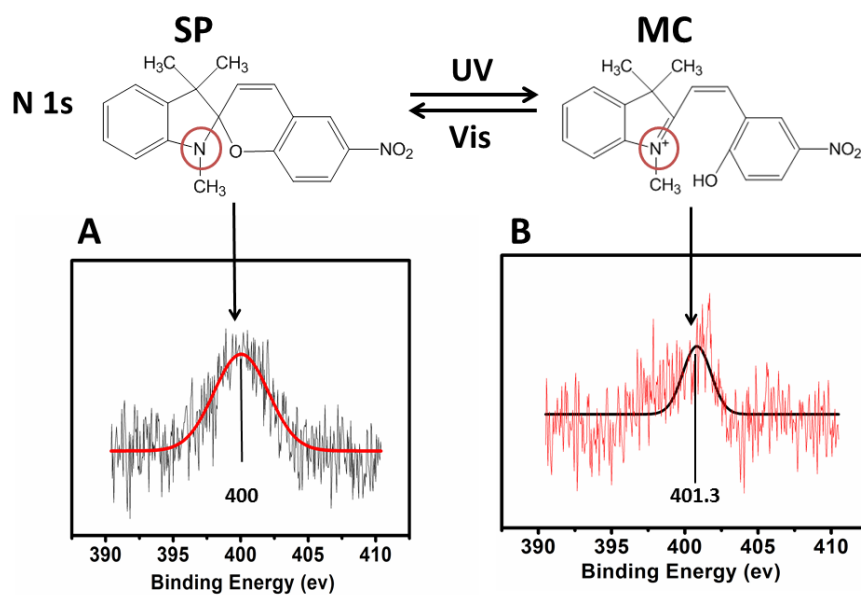

**Figure S14.** X-ray photoemission spectra of the N 1s core level regions of (A) the closed-ringed SP form and (B) open-ringed MC form.

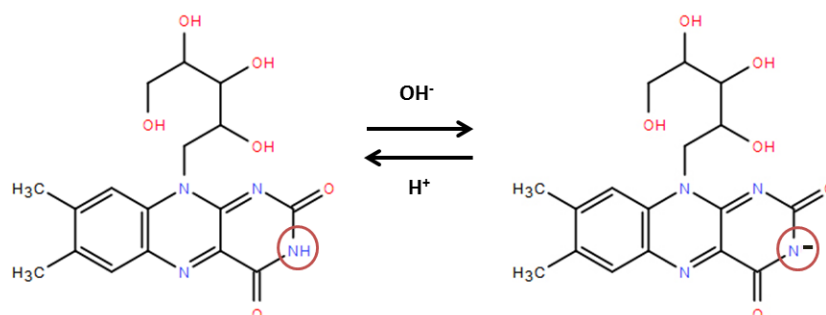

**Figure S15.** The transformation of molecular structure for riboflavin caused by pH value.<sup>[1]</sup>

1. G. R. Penzer and G. K. Radda, *Q. Rev. Chem. Soc.*, 1967, **21**, 43–65.
